# Supplementary material
Source: publisher site journal article supplement (https://www.kjim.org/upload/media/kjim-2021-475-suppl1.pdf)
Supplement: Supplementary file 1 [file kjim-2021-475-suppl1.pdf]

**Supplementary Table 1. Physician characteristics**

| Characteristic                   | All (n = 30) |
|----------------------------------|--------------|
| Practice setting                 |              |
| University/Teaching hospital     | 30 (100.00)  |
| Years to qualify as a practicing |              |
| 1985–1994                        | 8 (26.67)    |
| 1995–2004                        | 5 (16.67)    |
| 2005–2015                        | 17 (56.67)   |
| MPN patients seen, /yr           |              |
| MF                               | 5.07 ± 5.22  |
| PV                               | 5.43 ± 7.65  |
| ET                               | 6.53 ± 8.72  |

Values are presented as number (%) or mean ± standard deviation.

MPN, myeloproliferative neoplasm; MF, myelofibrosis; PV, polycythemia vera; ET, essential thrombocythemia.
